# Supplementary material
Source: MDPI journal article supplement (https://www.mdpi.com/2073-4441/12/1/69)
Supplement: s1 [file s1]

## 1. WRS Algorithm:

---

### WRS (D)

Input: All characteristic indicators of a data set

Output: A feature subset of a data set

BEGIN

// Initialization

```
1   $w = \{\varepsilon_1, \varepsilon_2, \dots, \varepsilon_n\}$  // Initialization of the Weights of Characteristic Indicators
2   $cluster = \phi$  // Initialization of clustering collections
3   $T$  // Initialization iterations' number
4   $I$  // Initialized cluster members' number
5   $S$  // Initialized the number of features in feature subset
6  for  $t < T$  or OCQ-NMI tends to be stable do
7      for  $i < I$  do
8           $features = sample(w, S)$ .
          //Select feature subsets randomly from feature indicators based on weight
9           $k = getClusterK(features)$ 
          // Calculates the number of clusters, as detailed in Algorithm 2
10          $c = kMedoids(features, k)$ 
          // Get clustering members from  $K$ -Medoids . Detailed algorithm is shown in algorithm 3
11         Save the cluster members in the cluster set
12          $OCQ-NMI = getOCQNMI(cluster)$ 
          //Calculate the OCQ-NMI index of the iterated clustering group
13         Update the set of weight  $w$  according to OCQ-NMI
END
```

---

## 2. getClusterK (D)

---

### getClusterK (D)

Input: data set to be clustered

Output: Optimal number of clusters

BEGIN

//Initialization

```
1   $N$  //Sample number of data sets
2   $k_{max} = \sqrt{N}$  //Calculate the maximum number of clusters
3   $k_{Dunn} = getKFromDunn(D)$  //Calculate the number of clusters based on Dunn index
4   $k_{CH} = getKFromCH(D)$  //Calculate the number of clusters based on CH index
5   $k_{DB} = getKFromDB(D)$  //Calculate the number of clusters based on the DB index
6  Choose the maximum value not greater than  $k_{max}$  from  $k_{Dunn}$ ,  $k_{CH}$  and  $k_{DB}$  as the optimal
```

number of clusters.

END

---

### 3. kMedoids (D)

---

#### *kMedoids (D)*

Input: Data set to be clustered, optimal number of clusters K

Output: Clustering results

BEGIN

//Initialization

- 1      $\alpha = \{\zeta_1, \zeta_2, \dots, \zeta_k\}$      // Select k initial centers at random
- 2      $\pi = \{\pi_1, \pi_2, \dots, \pi_k\}$      // Select k clusters at random
- 3      $E$      // Random cost set
- 4     for  $i < N$  do
- 5         The cluster  $\pi_j$  is assigned according to the distance between data point  $x_i$  and initial cluster center  $\zeta_j$ .
- 6     for  $\alpha$  change do
- 7         for  $i < k$  do
- 8             for  $x_j \in \pi_i$  do
- 9                 Compute  $E(x_j, \zeta_i)$  and add collection  $E$
- 10     Select the lowest cost point in set  $E$  that is greater than the threshold value to exchange with the origin center point in set  $\alpha$

END

---

### 4. getSWT ( $C_m^i, C_m^j, CT$ ) to Compute the Similarity of Clusters

---

#### *getSWT ( $C_m^i, C_m^j, CT$ )*

Input: Cluster  $C_m^i$  and  $C_m^j$ , Triple Set  $CT$  of Cluster  $C_m^i$  and  $C_m^j$

Output: The similarity of Cluster  $C_m^i$  and  $C_m^j$

BEGIN

// Initialization

- 1      $CT$      // Triple Set
- 2     for  $C_l^t \in CT$  do
- 3         Calculated  $W_{C_m^i}^{C_l^t}$  和  $W_{C_m^j}^{C_l^t}$  according to formula 9 in the article
- 4         Get the weights of two clusters:  $W = \min(W_{C_m^i}^{C_l^t}, W_{C_m^j}^{C_l^t})$
- 5          $WSum += W$
- 6         if  $W > W_{MAX}$
- 7              $W_{MAX} = W$
- 8     return  $WSum / W_{max}$

END

---

5.  $\text{getS}(\pi_m, x_i, x_j, \Pi)$  to Compute the Similarity of Data Points

---

$\text{getS}(\pi_m, x_i, x_j, \Pi)$

---

Input: Cluster Members  $\pi_m$ , Data Points  $x_i, x_j$ , Cluster Collection  $\Pi$

Output: Similarity of data points  $x_i, x_j$  within cluster member  $\pi_m$

BEGIN

// Initialization

```
1   CT           // Triple Set
2   Find clusters  $C_m^i$  and  $C_m^j$  in cluster member  $\pi_m$  where data points  $x_i$  and  $x_j$  are located
   respectively.
3   for  $\pi_k \in \Pi$  and  $\pi_k \neq \pi_m$  do
4       for  $C_k^i \in \pi_k$  do
5           if cluster  $C_m^i$ ,  $C_m^j$  and  $C_k^i$  make up a triple
6               Put cluster  $C_k^i$  into set  $CT$ 
7   if  $C_m^i = C_m^j$ 
8       return 1;
9   else
10      return  $\text{getSWT}(C_m^i, C_m^j, CT)$ 
END
```

---

6.  $\text{getS}(\pi_m, x_i, x_j, \Pi)$  to Compute the Similarity of Data Sets

---

$\text{WCT}(\Pi, X)$

---

Input: Cluster Collection  $\Pi$ , Data Set  $X$

Output: Clustering Collective CTS Similarity Matrix  $S$

BEGIN

// Initialization

```
1   N           // Number of data points in a data set
2   M           // Number of Cluster Members Included in Cluster Collection
3   S           // CTS Similarity Matrix
4   for  $i$  in  $1 : N$  do
5       for  $j$  in  $i : N$  do
6           sum = 0;
7           for  $m$  in  $1 : M$  do
8                $s = \text{getS}(\pi_m, x_i, x_j, \Pi)$ ;
9               sum += s;
```

10             $S[i,j] = S[j,i] = sum / M;$   
END

---
